# Supplementary material
Source: PubMed Central journal article supplement (PMC6591583)
Supplement: NIHMS1002144-supplement-Supplemental.pdf [file NIHMS1002144-supplement-Supplemental.pdf]

**Molecular Cell, Volume 71**

**Supplemental Information**

***In Vivo* Evidence for ATPase-Dependent  
DNA Translocation by the *Bacillus subtilis*  
SMC Condensin Complex**

**Xindan Wang, Anna C. Hughes, Hugo B. Brandão, Benjamin Walker, Carrie Lierz, Jared C. Cochran, Martha G. Oakley, Andrew C. Kruse, and David Z. Rudner**

Figure S1

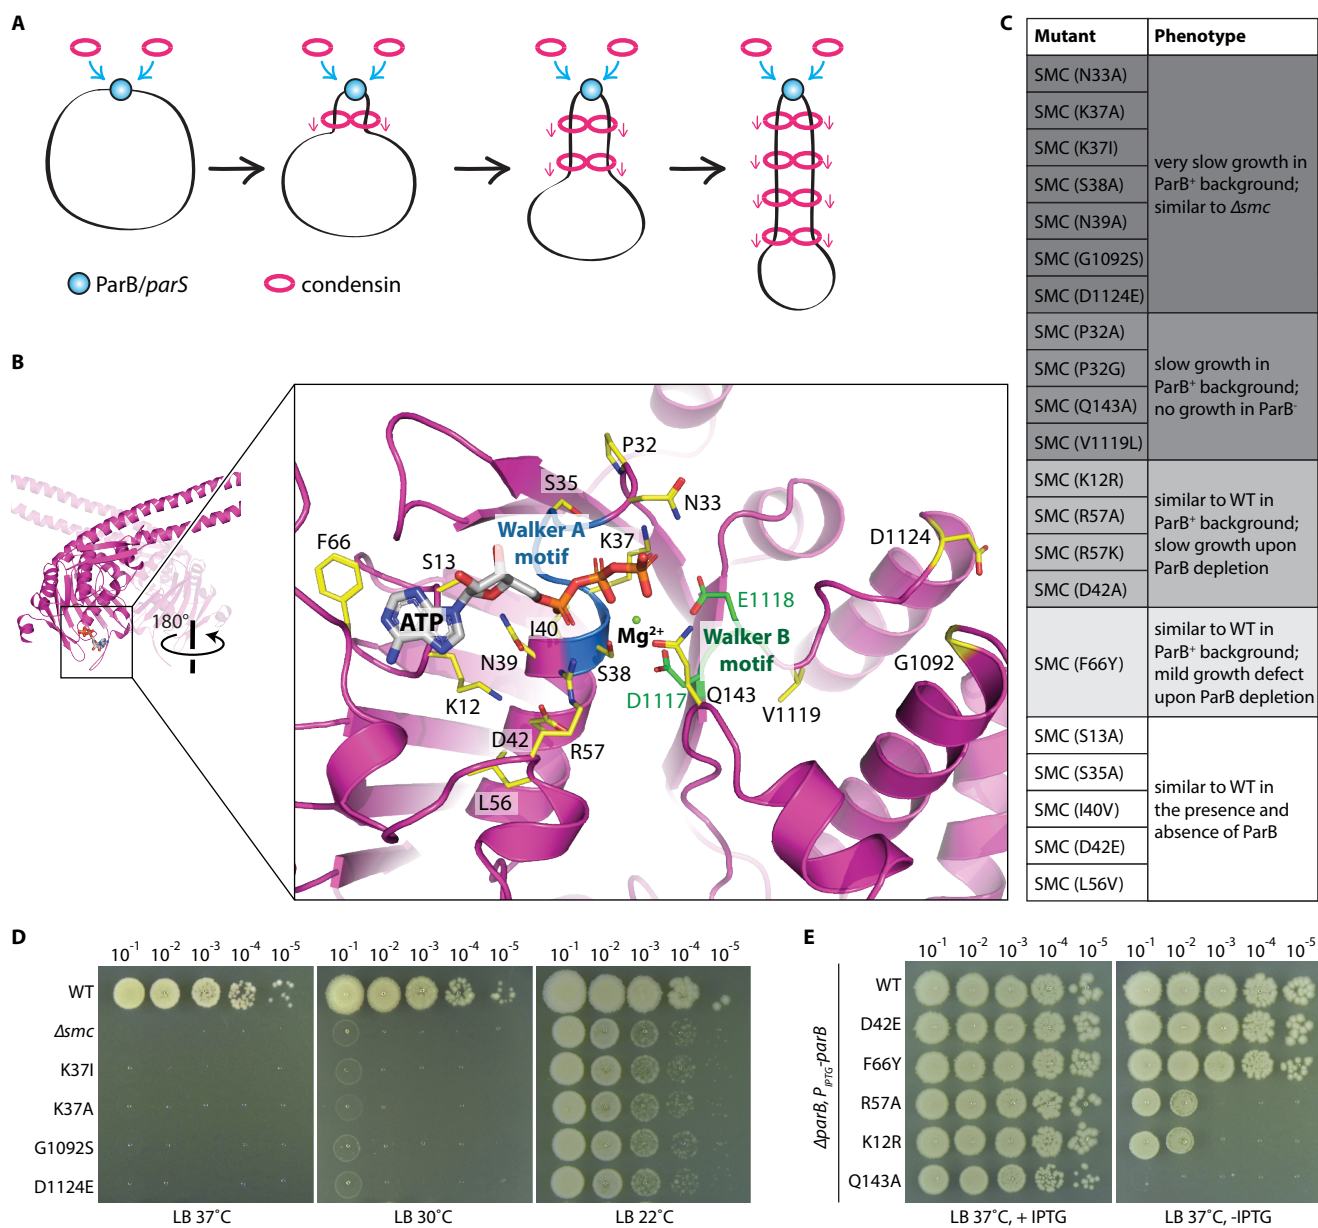

**Figure S1. Rational design and characterization of SMC ATPase mutants.**

**Related to Figure 1. A,** Schematic model of condensin-dependent loop formation in *B. subtilis*. Condensin is loaded onto the chromosomes by ParB bound to the centromeric *parS* site. Once loaded, the complex travels down the left and right chromosome arms while tethering them together. Double rings are depicted in the model but the architecture of the loop-forming complex is not known. **B,** Homology model of the ATPase domain of *B. subtilis* SMC generated using the apo-structure of *B. subtilis* SMC (PDB ID 3ZGX) (Burmans et al., 2013) and *Pyrococcus furiosus* SMC in complex with ATP (PDB ID 1XEX) (Lammens et al., 2004). A bound ATP and Mg<sup>2+</sup> ion were included during modeling as rigid bodies, positioned based on the *P. furiosus* SMC structure. Walker A and B motifs are highlighted in blue and green, respectively. Amino acids highlighted in yellow were individually mutated and tested. **C,** Table of growth phenotypes associated with the mutants in a strain harboring an IPTG-inducible *parB* gene. Cells were grown in the presence or absence of inducer on LB agar plates at 37°C. Mutants with similar phenotypes are grouped together from most severe (dark grey) to indistinguishable from wild-type (white). **D,** Spot dilutions of representative SMC mutants. Strains containing wild-type or indicated SMC mutants were grown in LB medium at 22°C. Cultures were normalized to an OD<sub>600</sub> of 2, then serially diluted and spotted on LB plates, and incubated at 37°C, 30°C or 22°C. The catalytic mutants K37I and K37A, the signature motif mutant G1092S, and the D-loop mutant D1124E had phenotypes similar to the  $\Delta smc$  mutant. **E,** Spot dilutions of indicated SMC mutants. Strains containing wild-type or indicated SMC mutants, and harboring an IPTG-inducible *parB* gene were grown in LB medium at 37°C in the presence of 1 mM IPTG. Cells were washed 3 times in LB, normalized to an OD<sub>600</sub> of 2, and serially diluted. 5  $\mu$ l of each dilution was spotted on LB agar plates with or without 1 mM IPTG. The plates were incubated at 37°C for 12 h.

Figure S2

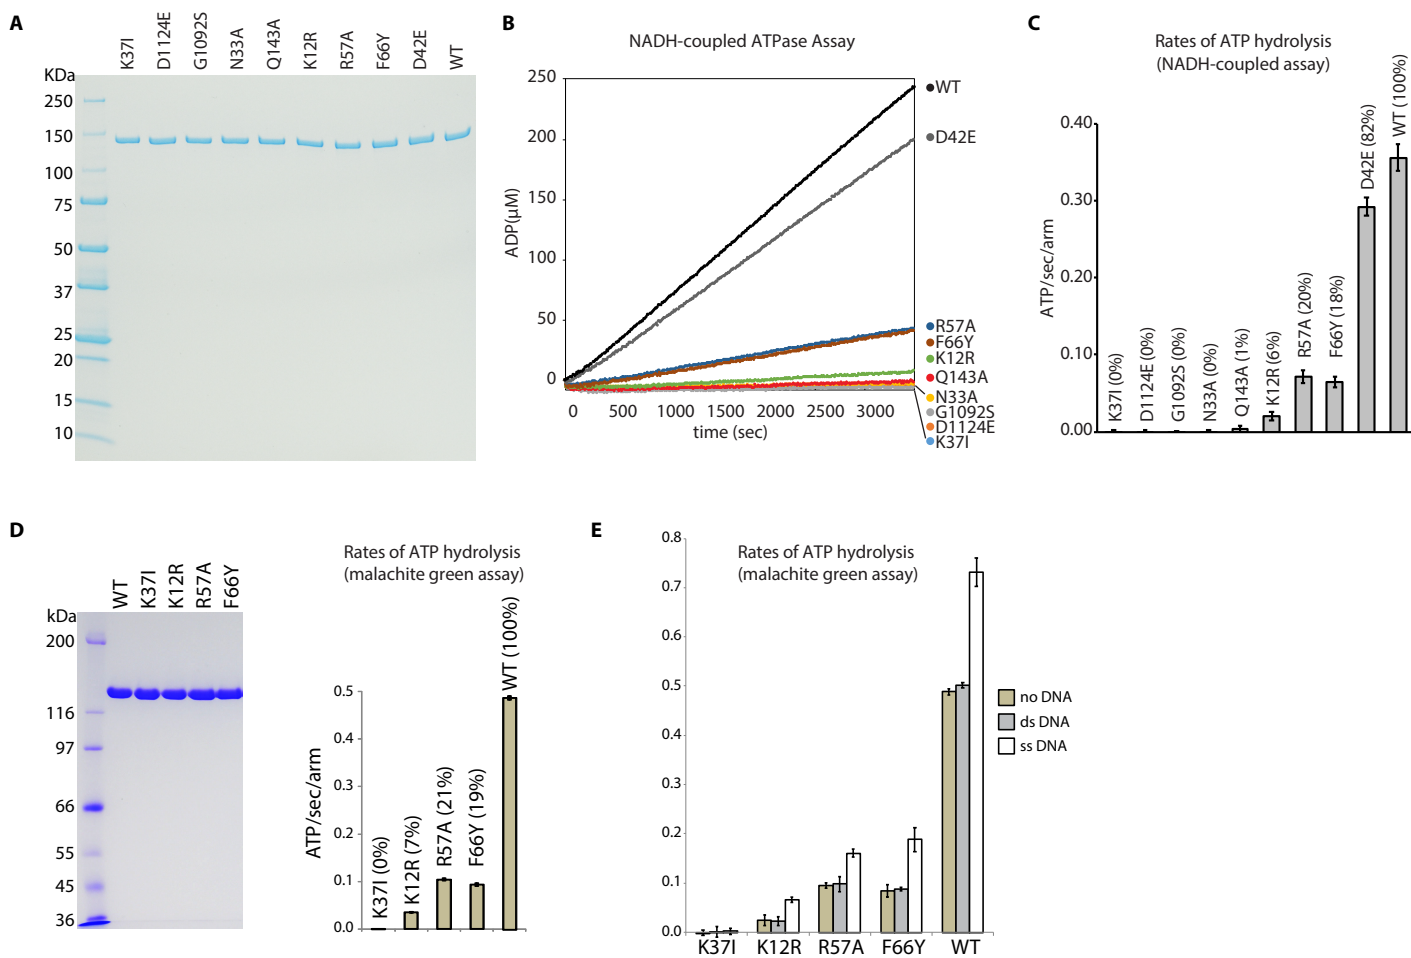

**Figure S2. ATPase rates of SMC mutants. Related to Figure 1.**

**A**, Protein gel of recombinant SMC-His<sub>6</sub> and point mutants. 0.5 µg of purified proteins were loaded onto 4-20% Tris-glycine gradient gel, stained with InstantBlue Protein Stain (Expedeon). **B**, NADH-coupled ATPase assays (see Methods). ADP product formed was plotted against time (second). The graph represents the average of two technical replicates from one experiment. **C**, Bar graph showing ATPase rates calculated using NADH-coupled ATPase assay in **B**. Error bars show the standard deviation of four independent experiments using frozen aliquots of proteins from the same protein preparations. Numbers in brackets indicate the ATPase rates of the mutants relative to the wild-type. **D**, ATPase rates measured using malachite green assay. Coomassie-stained gel of wild-type SMC and indicated mutants from a separate purification. The ATPase rates of the purified proteins were measured using malachite green assay (see Methods). Numbers in brackets indicate the ATPase rates of the mutants relative to the wild-type. Error bars show the standard deviation of three replicates. **E**, ATPase rates in the presence or absence of DNA. Proteins in **D** were used to perform malachite green ATPase assay in the presence or absence of 15.6 µM of double-stranded DNA (dsDNA; ΦX174 RF I DNA; NEB N3021L) or single-stranded DNA (ssDNA; ΦX174 viron DNA; NEB N3023L).

Figure S3

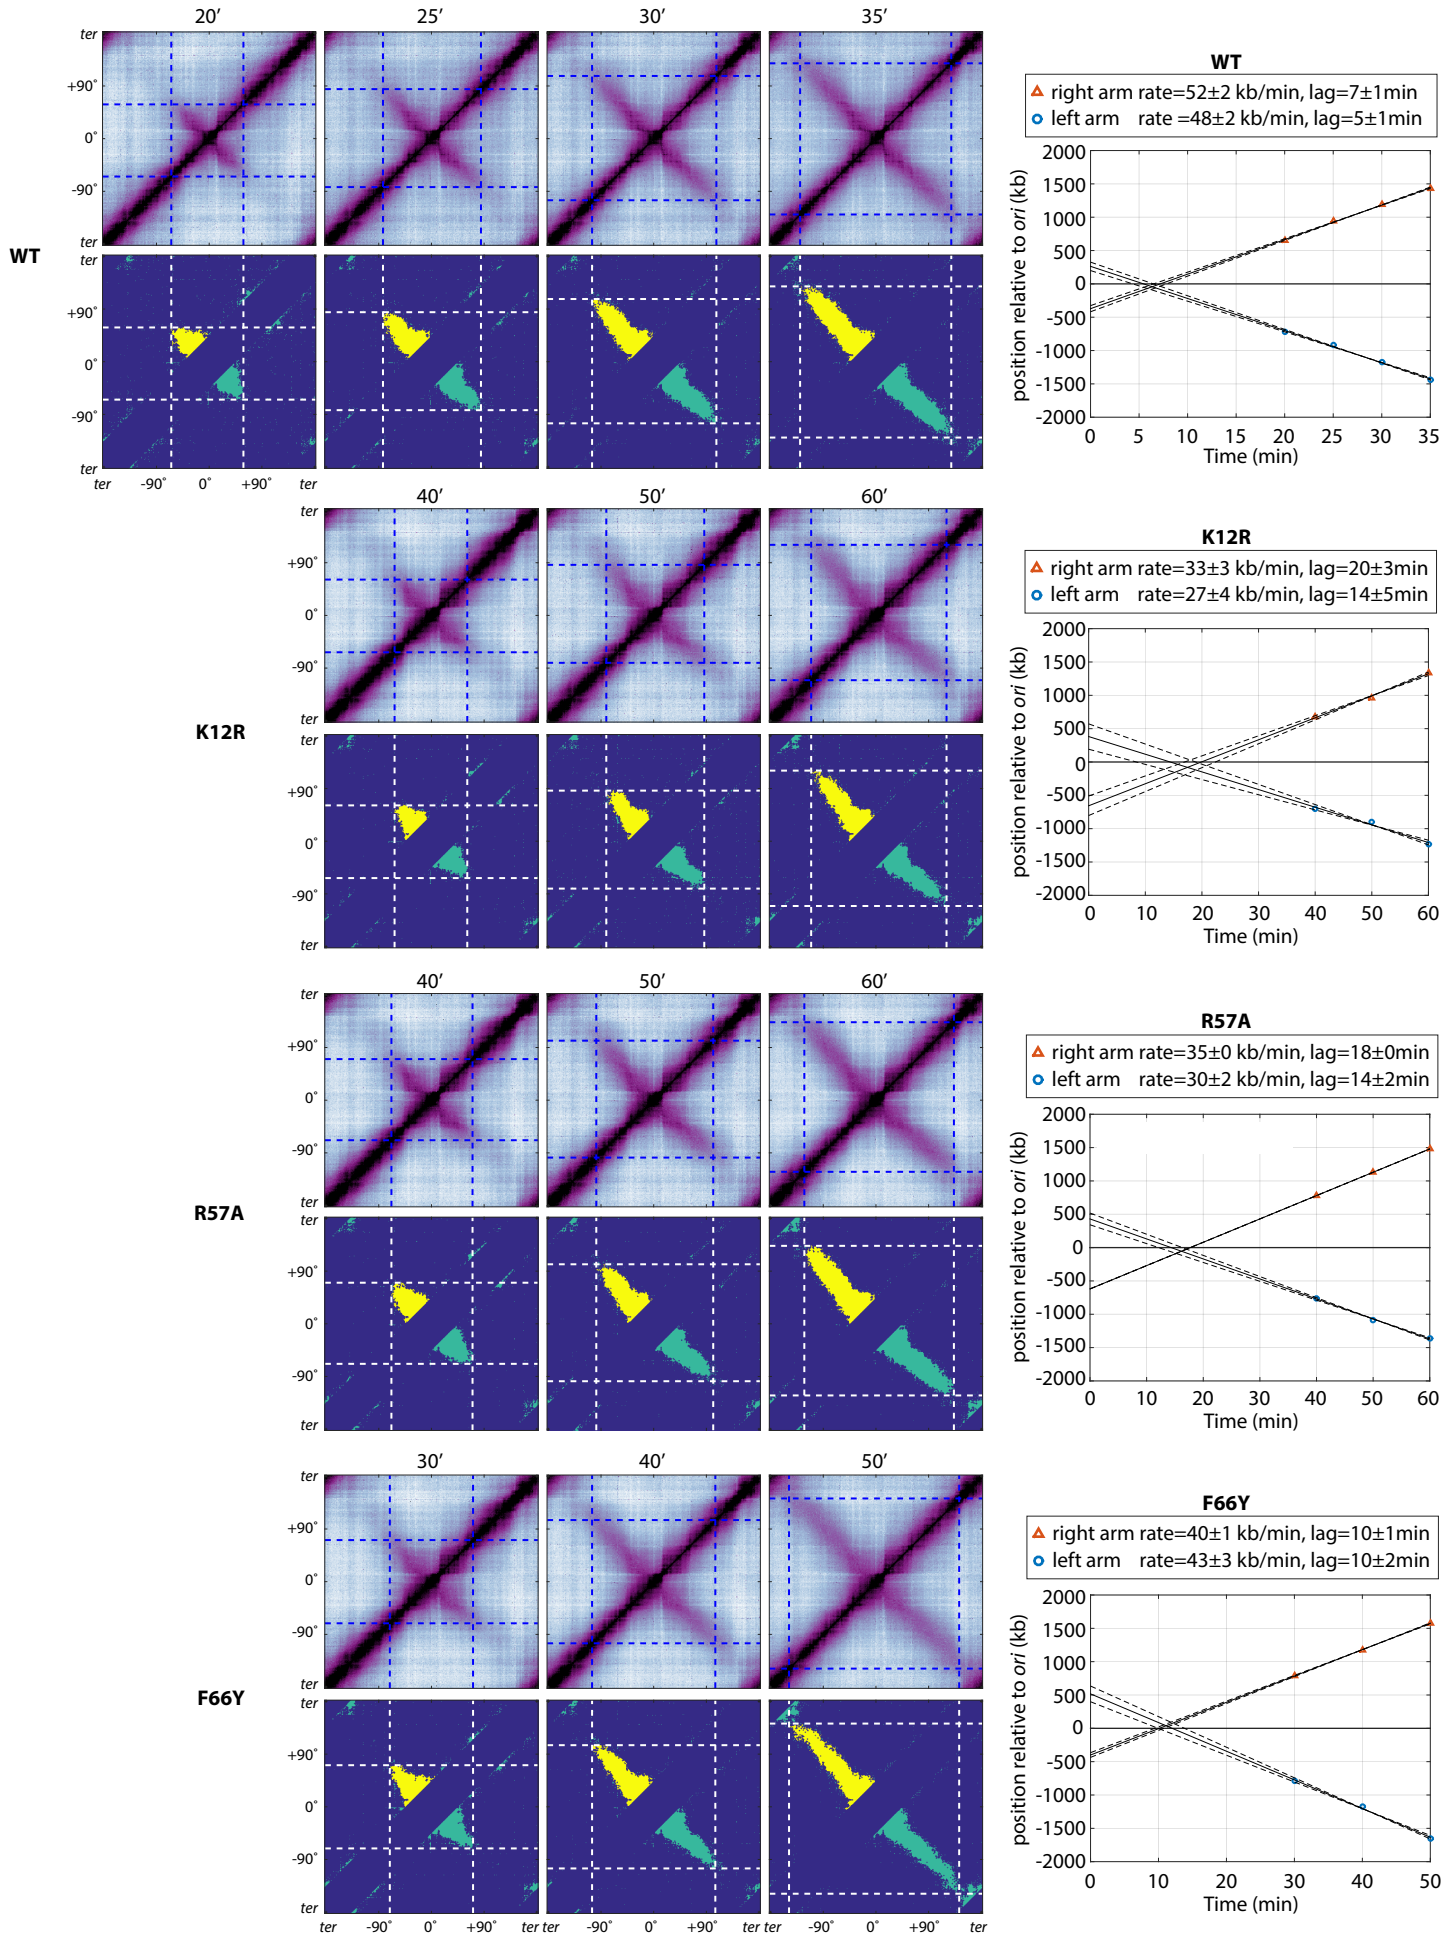

**Figure S3. Analysis of the rate of DNA juxtaposition. Related to Figure 2.**

The endpoints of DNA juxtaposition after ParB induction (from Figure 2A, B) were determined as described in the Methods, using a threshold of  $0.5x$  standard deviation ( $\sigma$ ) above the mean Hi-C score. Lower panels are binary maps showing points (light green and yellow) with Hi-C interactions scores above the specified threshold. Neighboring points that were separated by less than 5 pixels were connected. The largest region of inter-connected points (highlighted in yellow) was identified as the Hi-C enrichment region due to DNA juxtaposition. The enrichment endpoints are indicated with white dotted lines. For visualization, these positions were marked with blue dotted lines on the Hi-C contact maps in the upper panels. The positions (relative to the replication origin) were plotted on the graphs to the right. An endpoint position on the right arm is labeled as a positive value, and on the left arm as a negative value. The rates and errors for the DNA juxtaposition were calculated from the slope of the line-of-best-fit and the standard error of the regression, respectively. The leading edges of the DNA juxtaposition in the SMC mutants were less well defined than wild-type in this study and our previous study (Wang et al., 2017). We suspect that this is due to greater heterogeneity in loading and translocation. Accordingly, a less stringent threshold of  $0.5x\sigma$  was used in this analysis.

Figure S4

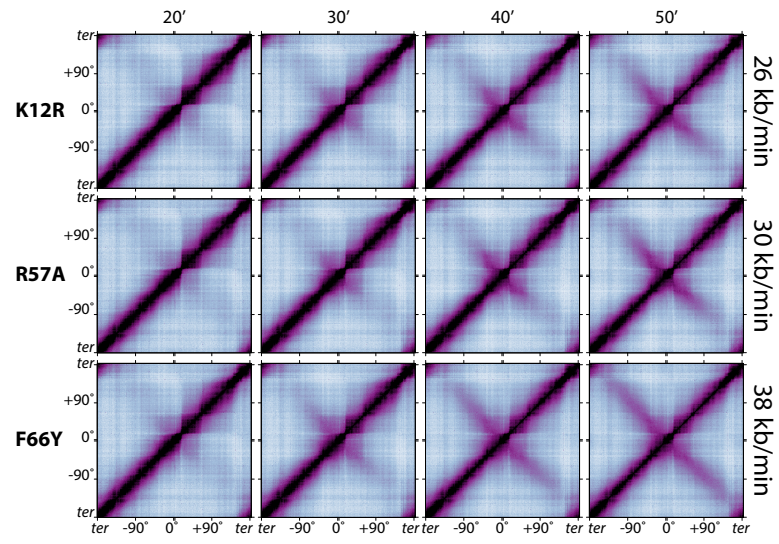



**Figure S4. Rate of DNA juxtaposition is reproducible. Related to Figure 2.** Hi-C contact maps from an independent experiment are shown. The rates of DNA juxtaposition are indicated on the right.

Figure S5

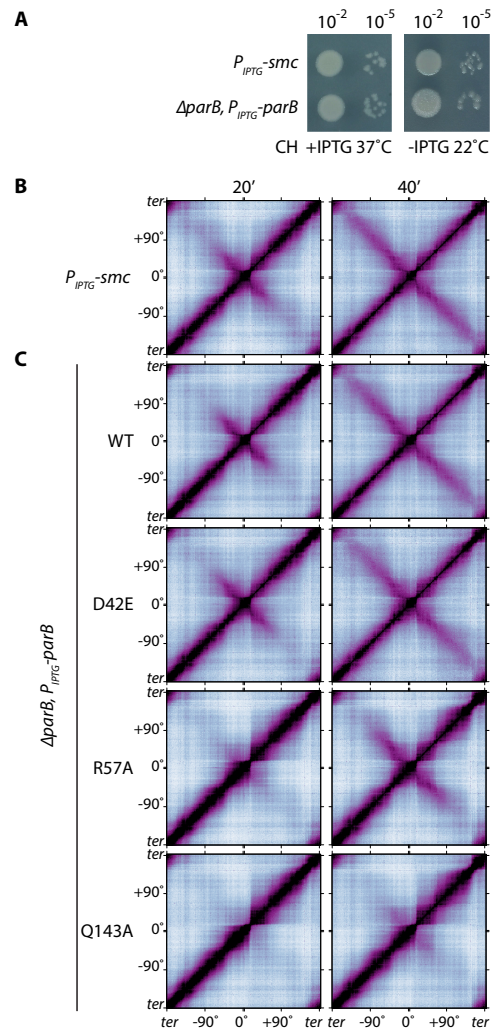

**Figure S5. Controls for Hi-C experiments. Related to Figure 2.**

**A**, Spot dilutions of the indicated strains on CH agar plates. The  $10^{-2}$  and  $10^{-5}$  dilutions are shown. To test the growth of cells for Hi-C experiments, indicated strains were grown in CH liquid medium at 22°C, normalized to an  $OD_{600}$  of 2 and spotted on CH plates with or without IPTG and incubated at 37°C and 22°C respectively. The *smc* depletion strain, which harbors an IPTG inducible *smc* gene grew similarly to *parB* depletion strain, which harbors an IPTG inducible *parB* gene.

**B and C**, Hi-C contact maps from the indicated strains. Cells were first grown in liquid CH medium at 22°C without IPTG. Then IPTG was added to 1 mM final concentration and the cultures were placed at 37°C. Samples were collected for Hi-C at 20 min and 40 min after IPTG addition. **B**, Hi-C contact map of the *smc* depletion strain, which contains an IPTG-inducible *smc* gene as the sole source of SMC in an otherwise wild-type background. **C**, Hi-C experiments of *parB* depletion strains, which contain an IPTG-inducible *parB* gene and the indicated SMC mutants.

**Table S1. Strains used in this study. Related to Figures 1 and 2.**

| strain  | genotype                                                                                                                        | reference               | figure |
|---------|---------------------------------------------------------------------------------------------------------------------------------|-------------------------|--------|
| BWX4077 | <i>parSΔ9 no a.b., Δspo0J (remains wt parS at -1')::spec, yvbJ::Pspank (optRBS) spo0J (ΔparS) cat, smc (WT) loxP-kan-loxP</i>   | this study              | 1B, 2  |
| BWX4078 | <i>parSΔ9 no a.b., Δspo0J (remains wt parS at -1')::spec, yvbJ::Pspank (optRBS) spo0J (ΔparS) cat, smc (R57A) loxP-kan-loxP</i> | this study              | 1B, 2  |
| BWX4149 | <i>parSΔ9 no a.b., Δspo0J (remains wt parS at -1')::spec, yvbJ::Pspank (optRBS) spo0J (ΔparS) cat, smc (K12R) loxP-kan-loxP</i> | this study              | 1B, 2  |
| BWX4152 | <i>parSΔ9 no a.b., Δspo0J (remains wt parS at -1')::spec, yvbJ::Pspank (optRBS) spo0J (ΔparS) cat, smc (F66Y) loxP-kan-loxP</i> | this study              | 1B, 2  |
| PY79    | <i>wild-type</i>                                                                                                                | (Youngman et al., 1983) |        |
| AG1468  | <i>Δspo0J (remains wt parS at -1')::spec, trpC2, pheA1</i>                                                                      | (Ireton et al., 1994)   |        |
| BWX3976 | <i>smc (WT) loxP-kan-loxP</i>                                                                                                   | this study              |        |
| BWX3990 | <i>smc (R57A) loxP-kan-loxP</i>                                                                                                 | this study              |        |
| BWX4129 | <i>smc (K12R) loxP-kan-loxP</i>                                                                                                 | this study              |        |
| BWX4137 | <i>smc (F66Y) loxP-kan-loxP</i>                                                                                                 | this study              |        |
| BWX4070 | <i>parSΔ9 no a.b., Δspo0J (remains wt parS at -1')::spec, yvbJ::Pspank (optRBS) spo0J (ΔparS) cat</i>                           | this study              |        |

**Table S2. Plasmids used in this study. Related to Figures 1 and 2.**

| plasmid | description                                      | reference               |
|---------|--------------------------------------------------|-------------------------|
| pKM309  | <i>smc-(his)6 (kan)</i>                          | (Sullivan et al., 2009) |
| pWX599  | <i>pelB::Psoj mcherry-spo0J (ΔparS) (cat)</i>    | (Wang et al., 2015)     |
| pWX722  | <i>yvbJ::Pspank (optRBS) spo0J (ΔparS) (cat)</i> | this study              |
| pWX740  | <i>smc(K12R)-(his)6 (kan)</i>                    | this study              |
| pWX741  | <i>smc(R57A)-(his)6 (kan)</i>                    | this study              |
| pWX742  | <i>smc(F66Y)-(his)6 (kan)</i>                    | this study              |
| pWX743  | <i>smc(K37I)-(his)6 (kan)</i>                    | this study              |
| pWX758  | <i>smc(N33A)-(his)6 (kan)</i>                    | this study              |
| pWX759  | <i>smc(D42E)-(his)6 (kan)</i>                    | this study              |
| pWX760  | <i>smc(Q143A)-(his)6 (kan)</i>                   | this study              |
| pWX762  | <i>smc(G1092S)-(his)6 (kan)</i>                  | this study              |
| pWX763  | <i>smc(D1124E)-(his)6 (kan)</i>                  | this study              |

**Table S3. Oligonucleotides used in this study. Related to STAR methods.**

| <b>oligos</b> | <b>sequence</b>                                    | <b>use</b> |
|---------------|----------------------------------------------------|------------|
| oWX438        | gaccagggagcactggtcaac                              | universal  |
| oWX439        | tcctctgctccctcgctcag                               | universal  |
| oWX523        | cattcaggagtcgagattatcgctcag                        | sequencing |
| oWX822        | ctttaacctcttctcgttactgaac                          | BWX3976    |
| oWX848        | gaagagctctgcccgtatctgaaaag                         | sequencing |
| oWX999        | tttGCTAGCcagagtggaggcaagaacgccttaaccc              | pWX722     |
| oWX1194       | gggaaagtgaagagatcctgagc                            | sequencing |
| oWX1195       | cttcacaatgaaaatgtcgaagag                           | sequencing |
| oWX1196       | gcccggcattcatcatttctcggg                           | sequencing |
| oWX1620       | tgagcaggtgcctgctgcaaagcg                           | BWX3976    |
| oWX1621       | ctgagcgagggagcagaagattattgttctgatgggttttgc         | BWX3976    |
| oWX1622       | gttgaccagtgctccctggtaatccccctatgactcagggggatttcag  | BWX3976    |
| oWX1623       | agcgtcctgctctattggcggatg                           | BWX3976    |
| oWX1624       | ttcgatatcataggcagtcagcgc                           | BWX3976    |
| oWX1625       | gatgttgcttttccgcttctgccggcccgaacaactgctgtcac       | pWX758     |
| oWX1626       | gggcccggcaggaagcggaaaaagcaacatc                    | pWX758     |
| oWX1631       | caaaaatgatgtcttccattttccgctgcaagagagcgtgccgattgttc | BWX3990    |
| oWX1633       | ggcggaaaaatggaagacatcattttg                        | BWX3990    |
| oWX1634       | gctcaggatctctccacttccccgcgctgataatagaaaaatgcttc    | pWX760     |
| oWX1635       | gggaaagtgaagagatcctgagc                            | pWX760     |
| oWX1661       | tttgcaaacggattccgtagac                             | BWX4129    |
| oWX1666       | gccattcgctgggttctcggcgaac                          | pWX759     |
| oWX1667       | ttcgcgagaaccagcgaatggcttccgtgatgttcttttcc          | pWX759     |
| oWX1668       | aaaCCCGGAcataaggaggaactactatggctaaaggccttgaaaagg   | pWX722     |
| oWX1696       | cgccgatctgtgctctcttattggaagatttctctaacc            | BWX4129    |
| oWX1702       | ctttctgaaactactcccagcataaatgatgtcttccattttcc       | BWX4137    |
| oWX1703       | gctgggagtgattcaagaagcg                             | BWX4137    |
| oWX1732       | ggaaatccgttctgcaaatgatctaaatcctataacgtctaaacg      | pWX740     |
| oWX1733       | cgtttagacgttataggatttagatcattgcagaacggatttcc       | pWX740     |
| oWX1736       | gatgtcttccattttccgctgcaagagagcgtgccgattgttc        | pWX741     |
| oWX1737       | gaacaatcggcacgctctctgacggcgaaaaatggaagacatc        | pWX741     |
| oWX1738       | ctttctgaaactactcccagcataaatgatgtcttccattttcc       | pWX742     |
| oWX1739       | ggaaaaatggaagacatcattatgctgggagtgattcaagaaag       | pWX742     |
| oWX1744       | gaatggcatccgtgatgttctgattccgcttccgttccggcccgcac    | pWX743     |
| oWX1745       | gtcgggcccgaacggaagcgaatcagcaacatcacggatgccattc     | pWX743     |
| oWX1746       | ggcgtagaggatcgagatctcg                             | sequencing |
| oWX1747       | ccggatatagttcctccttcagc                            | sequencing |
| oWX1792       | cgctatagcagtaagcgcacgctctgagcctgacaggaggttaagtttg  | pWX762     |
| oWX1793       | gagcgtgcgcttactgctatagcg                           | pWX762     |
| oWX1794       | cgcaaatcggaacacattcgttcttcgagcgcagcctctacttc       | pWX763     |
| oWX1795       | gaagtagaggctgcgctcgaagaagcgaatgtgttccgatttcg       | pWX763     |

Restriction endonuclease sites are capitalized.
